# Supplementary material for: Targeting Oral Squamous Cell Carcinoma with Combined Polo-Like-Kinase-1 Inhibitors and γ-Radiation Therapy
Source: MDPI journal article supplement (doi:10.3390/biomedicines12030503), 2024-02-23

Supplementary  
Figure S1

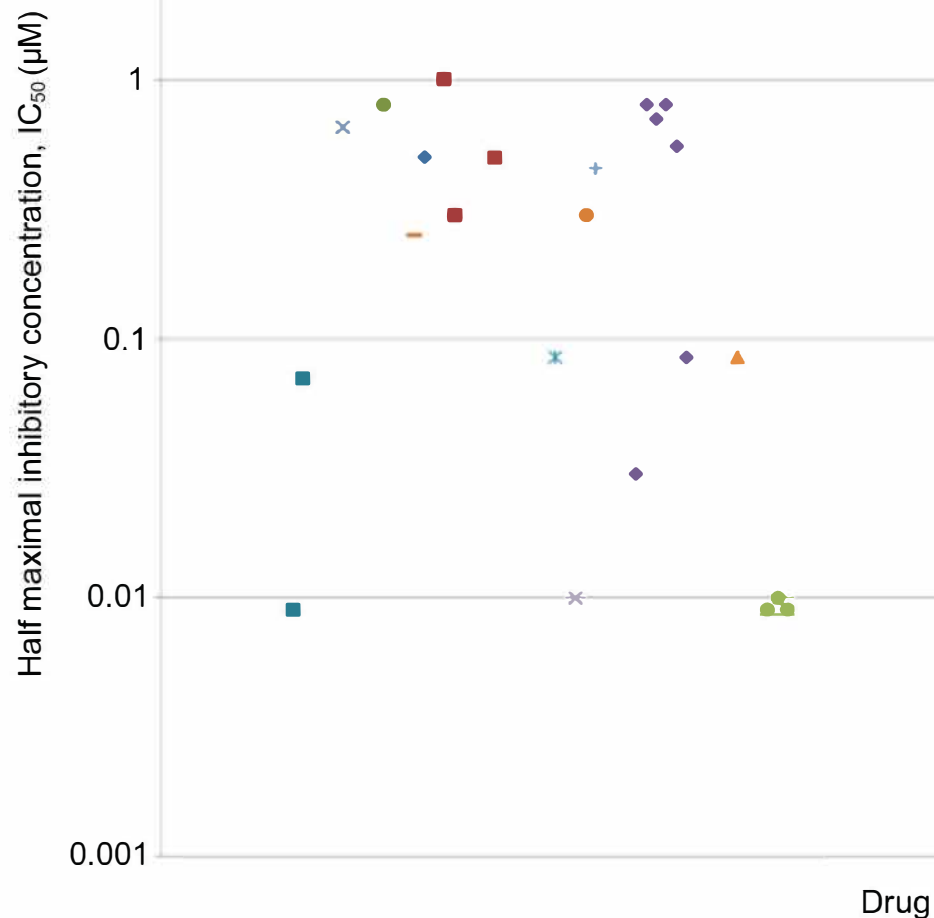

- ◆ 5α-reductase Inhibitor
- Abl/Src Inhibitor
- ▲ Adenosine Receptor Agonist
- × Adenosine Receptor Antagonist
- ✕ AHR Antagonist
- Akt Inhibitor
- + AMPK Activator
- Androgen Receptor Inhibitor
- Antihistamine
- ◆ Angiotensin Receptor Antagonist
- Aurora Kinase Inhibitor
- ▲ Bcl-2 Inhibitor
- × Bcr-Abl Inhibitor
- ✕ B-Raf Inhibitor
- Bruton's TK Inhibitor
- + Cathepsin Inhibitor
- CCR5 Antagonist
- CDK Inhibitor
- ◆ Checkpoint Kinase Inhibitor
- c-Met Inhibitor
- ▲ COX-2 Inhibitor
- × CRTH2-R Antagonist
- ✕ EGF-R Inhibitor
- ErbB-R Inhibitor
- + ERK2 Inhibitor
- FGFR Inhibitor
- FLT3 Inhibitor
- ◆ HDAC Inhibitor
- Hedgehog Pathway Inhibitor
- ▲ HER1/2 Inhibitor
- × HIV Integrase Inhibitor
- ✕ HMG-CoA Reductase Inhibitor
- HSP 90 Inhibitor
- + ICE/Caspase-1 Inhibitor
- IGF-1R Inhibitor
- Immunodulator
- ◆ Immunosuppressant
- JAK Inhibitor
- ▲ LTR Antagonist
- × 74, 75, 76, 77, 78, 79
- ✕ mTOR Inhibitor
- Multi-Kinase Inhibitor
- + NAsynthesis Inhibitor
- NPM-ALK Inhibitor
- p38 MPK Inhibitor
- ◆ p90 RSK Inhibitor
- PARP Inhibitor
- ▲ PDE4 Inhibitor
- × PGD2-R Antagonist
- ✕ Phospholipase A2 Inhibitor
- PI3K Inhibitor
- **PLK Inhibitor**
- ◆ Protease Inhibitor
- Proteasome Inhibitor
- ◆ RTK Inhibitor
- RXR Activator
- ▲ SMO Inhibitor
- × Src Inhibitor
- ◆ Survivin Suppressant
- T Cell Activation Inhibitor
- ◆ TK Inhibitor
- ◆ Topoisomerase I Inhibitor
- ◆ Topoisomerase II Inhibitor
- Tubulin Stabilizer
- VEGF-R Inhibitor

Supplementary  
Figure S2

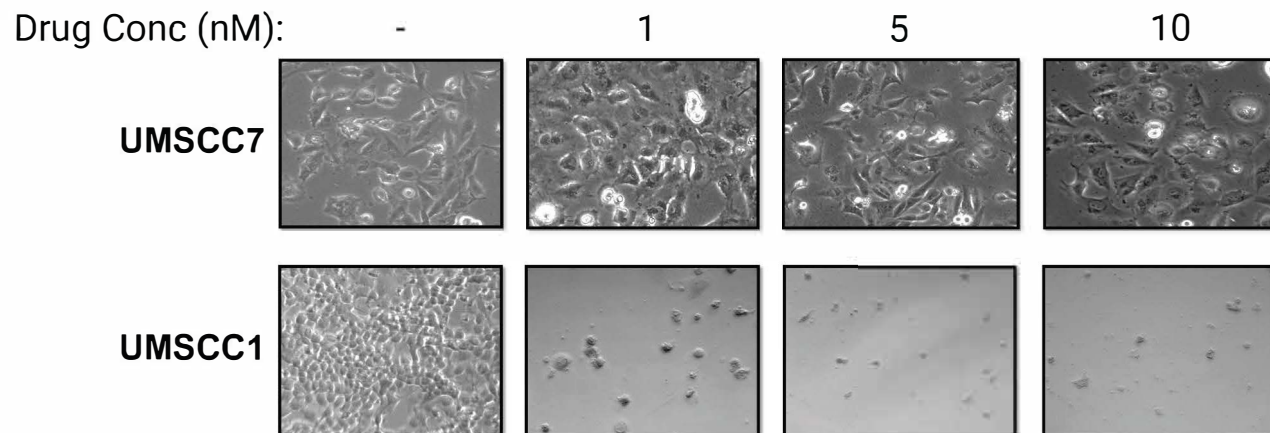

Supplementary  
Figure S3

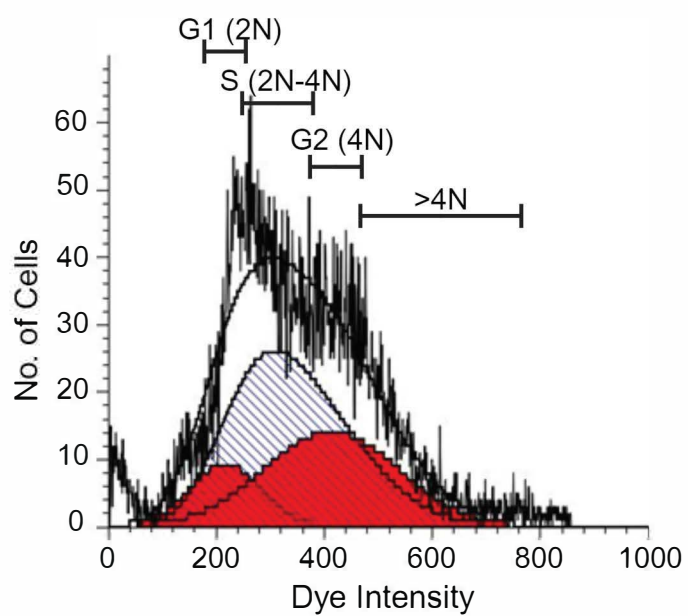

Supplementary  
Figure S4

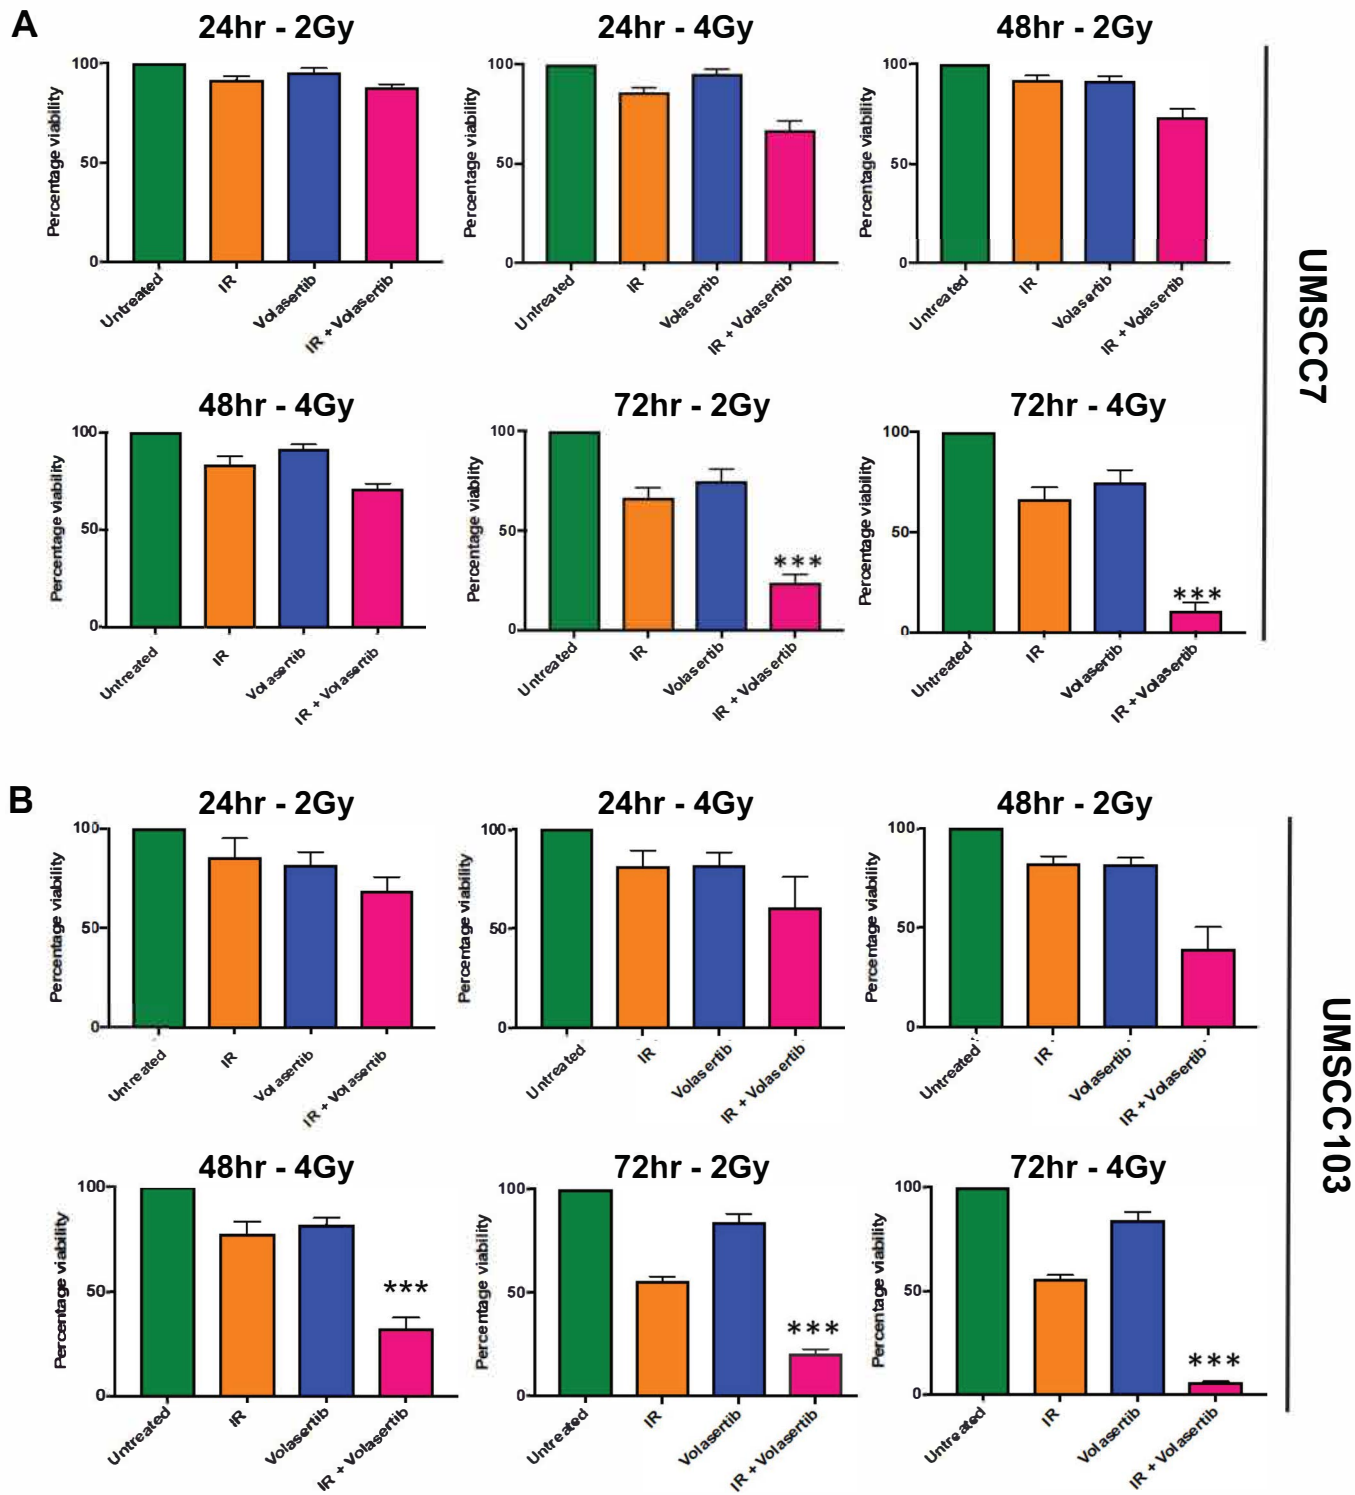

Supplementary  
Figure S5

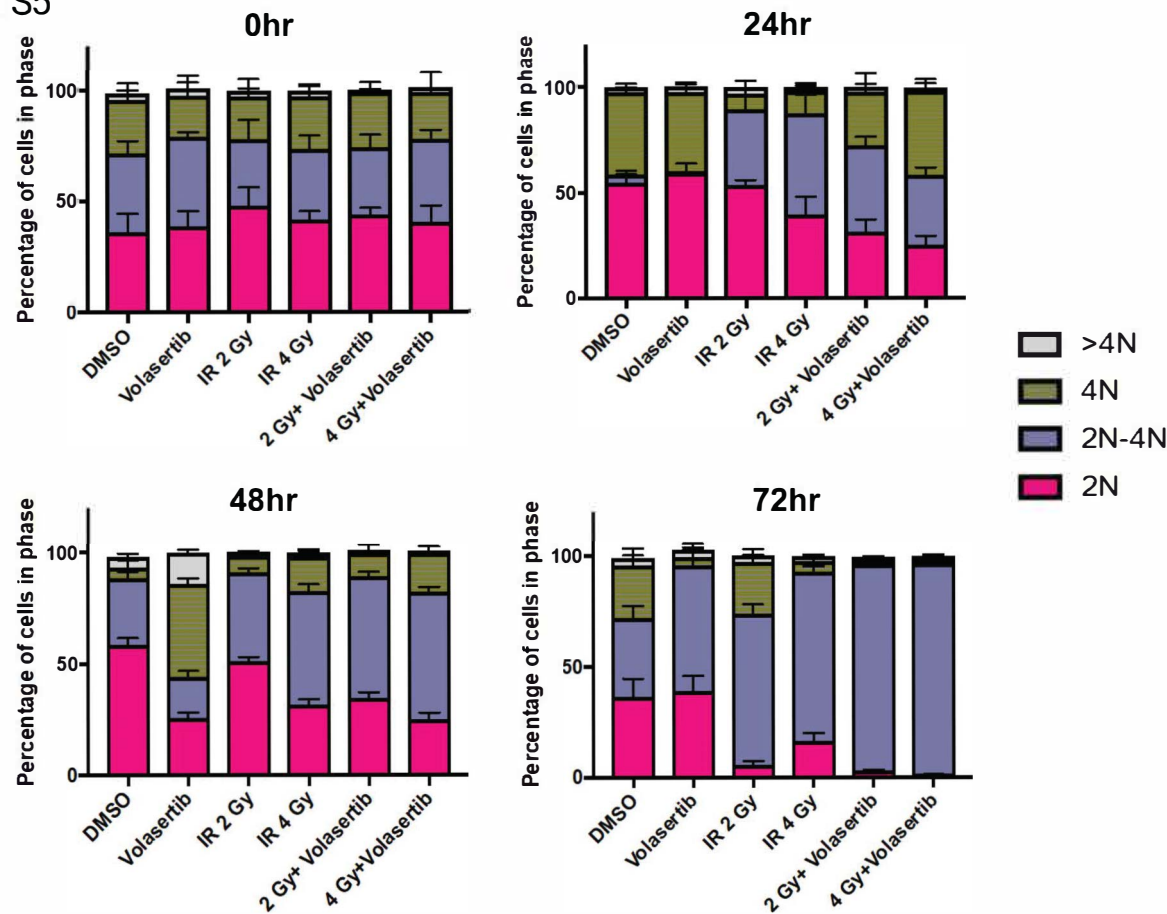

Supplement: s1 [file s1]
